# Supplementary material
Source: publisher figshare collection journal article supplement (https://tandf.figshare.com/ndownloader/files/13082327)
Supplement: Supplementary file 1 [file 13082327]

## SUPPLEMENTARY MATERIALS

### **Silver-enhanced lateral flow immunoassay for highly-sensitive detection of potato leafroll virus**

**Vasily G. Panferov<sup>1</sup>, Irina V. Safenkova<sup>1</sup>, Nadezhda A. Byzova<sup>1</sup>, Yuri A. Varitsev<sup>2</sup>, Anatoly V. Zherdev<sup>1</sup>, Boris B. Dzantiev<sup>1\*</sup>**

<sup>1</sup> A.N. Bach Institute of Biochemistry, Research Center of Biotechnology of the Russian Academy of Sciences, Moscow, 119071 Russia

<sup>2</sup> A.G. Lorch All-Russian Potato Research Institute, Kraskovo, Moscow region, 140051 Russia

\* [dzantiev@inbi.ras.ru](mailto:dzantiev@inbi.ras.ru)

## Spectral studies of GNPs and their conjugate

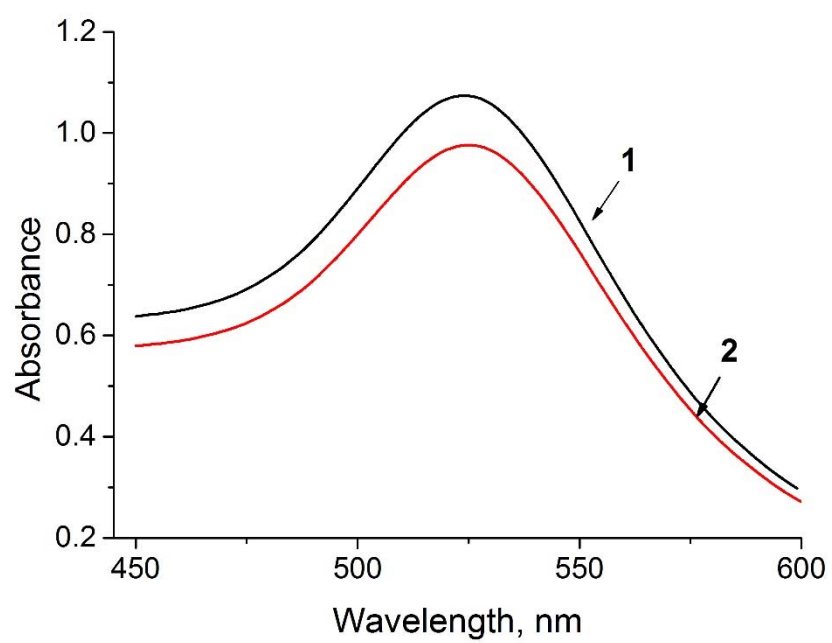

**Figure S1.** Adsorption spectra for GNPs (1) and GNP-antibody conjugate (2)

## Silver enhancement of LFIA for PLRV assay in buffer

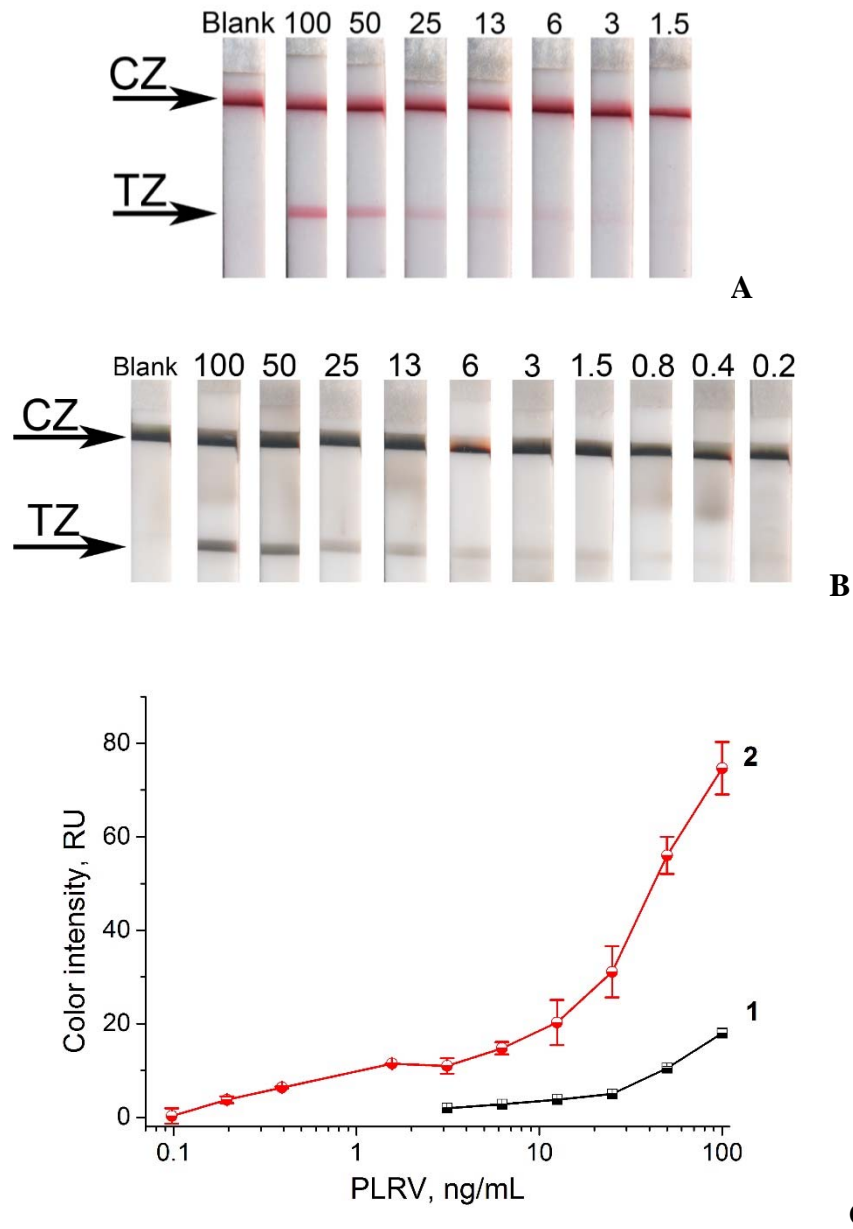

**Figure S2.** Results of LFIA for PLRV in buffer: (A) Appearance of the test strips after convenient LFIA (CZ, control zone; TZ, test zone). The number above the strip denotes PLRV concentration (ng/mL). (B) Appearance of the test strips after LFIA with silver enhancement. The notations are the same as in (A). (C) Color intensity of the test zone depending on PLRV concentration. Curves 1 and 2 correspond to the test strips presented at (A) and (B), respectively.

## Analysis of infected potato leaves

**Table S1.** Results of ELISA and LFIA for dilutions of leaf extracts of infected potatoes

| <b>Sample</b> | <b>Dilution</b> | <b>ELISA</b> | <b>Convenient LFIA</b> | <b>LFIA with silver enhancement</b> |
|---------------|-----------------|--------------|------------------------|-------------------------------------|
| Extract 1     | 1:50            | +            | +                      | +                                   |
|               | 1:500           | +            | +                      | +                                   |
|               | 1:2,500         | –            | +/-                    | +                                   |
|               | 1:4,000         | –            | –                      | +                                   |
| Extract 2     | 1:50            | +            | +                      | +                                   |
|               | 1:500           | +            | +                      | +                                   |
|               | 1:2,500         | –            | +/-                    | +                                   |
|               | 1:4,000         | –            | –                      | +                                   |
| Extract 3     | 1:50            | +            | +                      | +                                   |
|               | 1:500           | +            | +                      | +                                   |
|               | 1:2,500         | –            | +/-                    | +                                   |
|               | 1:4,000         | –            | –                      | +                                   |
